# Supplementary material for: The mitochondrial genetic landscape in neuroblastoma from tumor initiation to relapse
Source: PubMed Central journal article supplement (PMC4872737; doi:10.18632/oncotarget.6776), 2015-12-28
Supplement: oncotarget-07-6620-s001.pdf [file oncotarget-07-6620-s001.pdf]

# The mitochondrial genetic landscape in neuroblastoma from tumor initiation to relapse

## Supplementary Materials

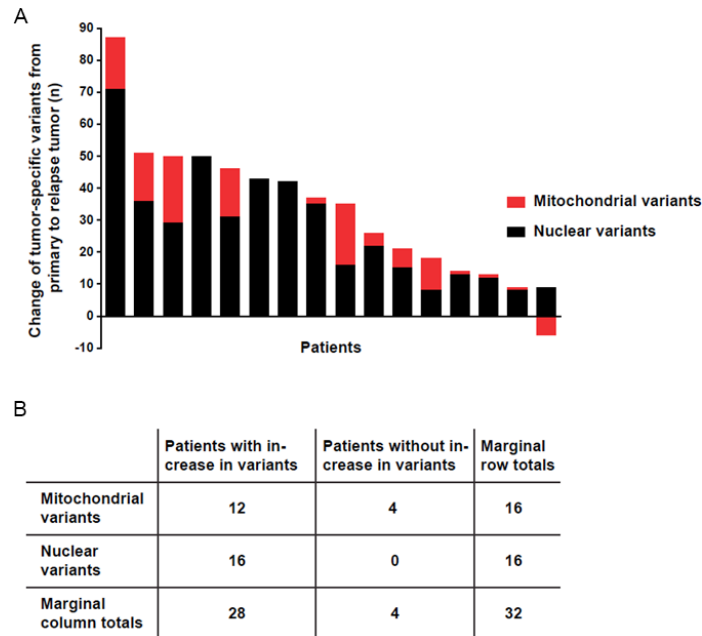

**Supplementary Figure S1: Concomitant increase of tumor-specific variants in the nuclear and mt genomes from primary to relapsed NB.** (A) Increase in tumor-specific variants in both the nuclear and the mt genomes of paired primary and relapsed NB at relapse. Shown are the number of tumor-specific variants in the nuclear (black) and mt (red) genome that changed in the relapsed tumor compared to the primary tumor of each patient. Spearman's rank correlation test resulted in a  $r$ -value of 0.0607 and a  $p$ -value of 0.8232. (B) Concordant increment of tumor-specific variants in both genomes at relapse. Concordance between the nuclear and mt changes in tumor-specific variants from primary tumors to relapse tumors was evaluated using Fisher's exact test, resulting in a  $p$ -value of 0.1012. Patients without increase include patients with decreasing and unchanging variants.

**Supplementary Table S1: Patient characteristics**

| Patient | Gender | Stage <sup>a</sup> | Age at diagnosis <sup>b</sup> | Tumor <sup>c</sup> | MYCN <sup>d</sup> |
|---------|--------|--------------------|-------------------------------|--------------------|-------------------|
| 1       | f      | 4                  | 514                           | P                  | a                 |
|         |        |                    |                               | R1                 | a                 |
| 2       | m      | 4                  | 989                           | P                  | a                 |
|         |        |                    |                               | R2                 | a                 |
| 3       | m      | 2b                 | 810                           | P                  | a                 |
|         |        |                    |                               | R1                 | a                 |
| 4       | f      | 4                  | 1964                          | P                  | a                 |
|         |        |                    |                               | R1                 | a                 |
| 5       | m      | 4                  | 1371                          | P                  | a                 |
|         |        |                    |                               | R1                 | a                 |
| 6       | f      | 4s                 | 119                           | P                  | na                |
|         |        |                    |                               | R1                 | a                 |
| 7       | m      | 4                  | 416                           | P                  | a                 |
|         |        |                    |                               | R1                 | na                |
| 8       | f      | 4                  | 1221                          | P                  | na                |
|         |        |                    |                               | R1                 | na                |
| 9       | m      | 4                  | 2337                          | P                  | na                |
|         |        |                    |                               | R1                 | na                |
| 10      | f      | 2b                 | 1787                          | P                  | na                |
|         |        |                    |                               | R3                 | na                |
| 11      | m      | 4                  | 1812                          | P                  | na                |
|         |        |                    |                               | R1                 | na                |
| 12      | f      | 2a                 | 4273                          | P                  | na                |
|         |        |                    |                               | R1                 | na                |
|         |        |                    |                               | R2                 | na                |
|         |        |                    |                               | R3                 | nd                |
|         |        |                    |                               | R4                 | na                |
|         |        |                    |                               | R5                 | na                |
| 13      | m      | 3                  | 1408                          | P                  | na                |
|         |        |                    |                               | R1                 | na                |
| 14      | f      | 4                  | 1520                          | P                  | nd                |
|         |        |                    |                               | R1                 | nd                |
| 15      | m      | 4                  | 1444                          | P                  | na                |
|         |        |                    |                               | R1                 | na                |
| 16      | m      | 2a                 | 59                            | P                  | na                |
|         |        |                    |                               | R1                 | h                 |

<sup>a</sup>International Neuroblastoma Staging System.

<sup>b</sup>Age at diagnosis in days.

<sup>c</sup>P, primary tumor; R1-R5: first, second, third, fourth and fifth relapse.

<sup>d</sup>a, amplified; na, not amplified; nd, not determined; h, heterogeneous.

**Supplementary Table S2: Tumor-specific mt variants**

| Patient |         | Variant position and substitution <sup>a</sup> |     |   |          |           | Variant allele frequency (%) <sup>b</sup> |     |     |     |    |    |  |
|---------|---------|------------------------------------------------|-----|---|----------|-----------|-------------------------------------------|-----|-----|-----|----|----|--|
|         |         |                                                |     |   |          |           | P                                         | R1  | R2  | R3  | R4 | R5 |  |
| 1       | 16sRNA  | 2259                                           | C   | > | T        | nc        | 4.4                                       | 2.9 |     |     |    |    |  |
|         | COX1    | 7337                                           | G   | > | A        | Ser478Ser | < 1                                       | 3.2 |     |     |    |    |  |
|         | ND4     | 10778                                          | C   | > | A        | *Pro7Thr  | 2.1                                       | < 1 |     |     |    |    |  |
|         | ND4     | 11719                                          | A   | > | G        | Gly320Gly | 2.1                                       | < 1 |     |     |    |    |  |
|         | ND5     | 13326                                          | T   | > | C        | Cys330Cys | 2.9                                       | < 1 |     |     |    |    |  |
|         | ND5     | 13680                                          | C   | > | T        | Pro448Pro | 4.8                                       | 3.5 |     |     |    |    |  |
|         | tRNAGlu | 14727                                          | T   | > | C        | nc        | 2.9                                       | < 1 |     |     |    |    |  |
|         | CYTB    | 14766                                          | T   | > | C        | Ile7Thr   | 6.1                                       | < 1 |     |     |    |    |  |
|         | CYTB    | 14872                                          | C   | > | T        | Ile42Ile  | 4.6                                       | 2.0 |     |     |    |    |  |
|         | CYTB    | 15773                                          | G   | > | A        | Val343Met | 5.9                                       | < 1 |     |     |    |    |  |
|         | D-Loop  | 16519                                          | C   | > | T        | nc        | 3.5                                       | < 1 |     |     |    |    |  |
|         | 2       | D-Loop                                         | 73  | A | >        | G         | nc                                        | < 1 |     | 2.5 |    |    |  |
|         |         | D-Loop                                         | 252 | T | >        | C         | nc                                        | < 1 |     | 2.6 |    |    |  |
| D-Loop  |         | 477                                            | C   | > | T        | nc        | < 1                                       |     | 3.6 |     |    |    |  |
| ND2     |         | 5249                                           | T   | > | C        | Phe266Phe | < 1                                       |     | 2.5 |     |    |    |  |
| COX1    |         | 6146                                           | A   | > | G        | Trp81Trp  | < 1                                       |     | 2.4 |     |    |    |  |
| COX1    |         | 7028                                           | C   | > | T        | Ala375Ala | < 1                                       |     | 2.2 |     |    |    |  |
| COX3    |         | 9380                                           | A   | > | G        | Trp58Trp  | < 1                                       |     | 7.1 |     |    |    |  |
| ND4     |         | 10907                                          | T   | > | C        | Phe50Leu  | < 1                                       |     | 2.0 |     |    |    |  |
| ND4     | 11009   | T                                              | >   | C | Leu84Leu | < 1       |                                           | 2.8 |     |     |    |    |  |
| 3       | 12sRNA  | 1243                                           | T   | > | C        | nc        | < 1                                       | 3.0 |     |     |    |    |  |
|         | 16sRNA  | 2159                                           | T   | > | C        | nc        | 4.3                                       | < 1 |     |     |    |    |  |
|         | 16sRNA  | 2301                                           | T   | > | C        | nc        | < 1                                       | 3.5 |     |     |    |    |  |
|         | 16sRNA  | 2706                                           | A   | > | G        | nc        | < 1                                       | 3.1 |     |     |    |    |  |
|         | ND1     | 3505                                           | A   | > | G        | Thr67Ala  | < 1                                       | 3.6 |     |     |    |    |  |
|         | COX1    | 6528                                           | C   | > | T        | Leu209Leu | < 1                                       | 2.6 |     |     |    |    |  |
|         | COX1    | 7028                                           | C   | > | T        | Ala357Ala | < 1                                       | 3.0 |     |     |    |    |  |
|         | COX2    | 7830                                           | G   | > | A        | Arg82His  | 5.4                                       | < 1 |     |     |    |    |  |
|         | ATP6    | 8994                                           | G   | > | A        | Leu156Leu | < 1                                       | 4.1 |     |     |    |    |  |
|         | ND3     | 10097                                          | A   | > | G        | Leu13Leu  | < 1                                       | 2.4 |     |     |    |    |  |
|         | ND4     | 11674                                          | C   | > | T        | Thr305Thr | < 1                                       | 3.3 |     |     |    |    |  |
|         | ND4     | 11719                                          | G   | > | A        | Gly320Gly | < 1                                       | 4.5 |     |     |    |    |  |
|         | ND4     | 11947                                          | A   | > | G        | Thr396Thr | < 1                                       | 2.5 |     |     |    |    |  |
|         | ND5     | 12414                                          | T   | > | C        | Pro26Pro  | < 1                                       | 2.2 |     |     |    |    |  |
|         | ND5     | 12705                                          | C   | > | T        | Ile123Ile | < 1                                       | 2.4 |     |     |    |    |  |
|         | ND6     | 14193                                          | A   | > | G        | Phe161Leu | 5.2                                       | < 1 |     |     |    |    |  |
|         | CYTB    | 14766                                          | C   | > | T        | Ile7Thr   | < 1                                       | 3.0 |     |     |    |    |  |
|         | CYTB    | 15326                                          | G   | > | A        | Thr194Ala | < 1                                       | 3.0 |     |     |    |    |  |
|         | CYTB    | 15775                                          | A   | > | G        | Val343Val | < 1                                       | 2.9 |     |     |    |    |  |
|         | D-Loop  | 16223                                          | C   | > | T        | nc        | < 1                                       | 2.7 |     |     |    |    |  |
| D-Loop  | 16292   | C                                              | >   | T | nc       | < 1       | 2.9                                       |     |     |     |    |    |  |
| D-Loop  | 16305   | A                                              | >   | T | nc       | < 1       | 2.6                                       |     |     |     |    |    |  |
| D-Loop  | 16311   | T                                              | >   | C | nc       | 5.7       | < 1                                       |     |     |     |    |    |  |

|   |          |       |   |   |   |           |     |      |  |  |  |  |
|---|----------|-------|---|---|---|-----------|-----|------|--|--|--|--|
| 4 | D-Loop   | 152   | C | > | T | nc        | < 1 | 4.1  |  |  |  |  |
|   | D-Loop   | 195   | C | > | T | nc        | < 1 | 7.1  |  |  |  |  |
|   | D-Loop   | 499   | A | > | G | nc        | < 1 | 4.5  |  |  |  |  |
|   | 16sRNA   | 2289  | G | > | A | *nc       | < 1 | 3.4  |  |  |  |  |
|   | 16sRNA   | 3010  | G | > | A | nc        | < 1 | 3.2  |  |  |  |  |
|   | COX1     | 7028  | T | > | C | Ala357Ala | < 1 | 4.1  |  |  |  |  |
|   | COX2     | 7645  | T | > | C | Leu20Leu  | < 1 | 3.7  |  |  |  |  |
|   | ATP6     | 8818  | T | > | C | Leu98Leu  | < 1 | 7.8  |  |  |  |  |
|   | ND4      | 11719 | A | > | G | Gly320Gly | < 1 | 3.3  |  |  |  |  |
|   | tRNAHis  | 12172 | A | > | G | nc        | < 1 | 2.9  |  |  |  |  |
|   | ND5      | 14034 | T | > | C | Ile566Ile | < 1 | 4.0  |  |  |  |  |
|   | ND6      | 14484 | T | > | C | Met64Val  | < 1 | 6.2  |  |  |  |  |
|   | ND6      | 14620 | T | > | C | Gly18Gly  | < 1 | 8.0  |  |  |  |  |
|   | CYTB     | 14766 | T | > | C | Ile7Thr   | < 1 | 4.3  |  |  |  |  |
|   | CYTB     | 15544 | A | > | C | Pro266pro | < 1 | 4.8  |  |  |  |  |
|   | CYTB     | 15693 | C | > | T | Thr316Met | < 1 | 5.8  |  |  |  |  |
|   | D-Loop   | 16256 | C | > | T | nc        | < 1 | 2.7  |  |  |  |  |
|   | D-Loop   | 16311 | T | > | C | nc        | < 1 | 2.1  |  |  |  |  |
|   | D-Loop   | 16356 | C | > | T | nc        | < 1 | 8.0  |  |  |  |  |
| 5 | D-Loop   | 73    | A | > | G | nc        | < 1 | 6.5  |  |  |  |  |
|   | D-Loop   | 152   | T | > | C | nc        | < 1 | 5.9  |  |  |  |  |
|   | D-Loop   | 217   | T | > | C | nc        | < 1 | 3.0  |  |  |  |  |
|   | 16sRNA   | 2718  | C | > | A | *nc       | < 1 | 2.0  |  |  |  |  |
|   | ND1      | 3992  | T | > | C | Met229Thr | < 1 | 6.2  |  |  |  |  |
|   | ND2      | 5390  | A | > | G | Met307Met | < 1 | 2.0  |  |  |  |  |
|   | COX1     | 6480  | G | > | A | Val193Ile | < 1 | 5.2  |  |  |  |  |
|   | COX2     | 7768  | A | > | G | Met61Met  | 2.2 | < 1  |  |  |  |  |
|   | ATP6     | 9055  | G | > | A | Ala177Thr | < 1 | 2.4  |  |  |  |  |
|   | ND4      | 11197 | C | > | T | Gly146Gly | < 1 | 2.6  |  |  |  |  |
|   | ND4      | 11467 | A | > | G | Leu236Leu | < 1 | 2.7  |  |  |  |  |
|   | ND4      | 11719 | G | > | A | Gly320Gly | < 1 | 7.7  |  |  |  |  |
|   | ND4      | 11732 | T | > | C | Leu325Leu | < 1 | 5.9  |  |  |  |  |
|   | tRNALeu2 | 12308 | A | > | G | nc        | 3.7 | < 1  |  |  |  |  |
|   | ND5      | 12372 | G | > | A | Leu12Leu  | < 1 | 3.7  |  |  |  |  |
|   | ND5      | 13708 | G | > | A | Ala458Thr | 5.5 | < 1  |  |  |  |  |
|   | ND6      | 14446 | C | > | A | *Glu76Asp | 2.3 | < 1  |  |  |  |  |
|   | CYTB     | 14766 | C | > | T | Thr7Ile   | < 1 | 6.5  |  |  |  |  |
|   | CYTB     | 14798 | T | > | C | Phe18Leu  | < 1 | 2.0  |  |  |  |  |
|   | CYTB     | 15693 | T | > | C | Met316Thr | < 1 | 2.8  |  |  |  |  |
|   | D-Loop   | 16179 | C | > | T | nc        | < 1 | 4.0  |  |  |  |  |
|   | D-Loop   | 16209 | T | > | C | nc        | < 1 | 2.3  |  |  |  |  |
|   | D-Loop   | 16263 | C | > | T | nc        | < 1 | 14.7 |  |  |  |  |
|   | D-Loop   | 16304 | T | > | C | nc        | < 1 | 3.8  |  |  |  |  |
|   | D-Loop   | 16519 | C | > | T | nc        | < 1 | 2.5  |  |  |  |  |
| 7 | 16sRNA   | 1811  | G | > | A | nc        | < 1 | 3.8  |  |  |  |  |
|   | 16sRNA   | 2706  | G | > | A | nc        | < 1 | 2.3  |  |  |  |  |
|   | 16sRNA   | 3010  | G | > | A | nc        | < 1 | 2.4  |  |  |  |  |

|    |         |       |   |   |   |            |     |     |  |  |  |  |
|----|---------|-------|---|---|---|------------|-----|-----|--|--|--|--|
|    | ND2     | 4811  | G | > | A | Trp114Trp  | < 1 | 3.3 |  |  |  |  |
|    | ND2     | 4968  | T | > | C | *Trp167Arg | < 1 | 5.1 |  |  |  |  |
|    | ND2     | 5342  | T | > | C | Tyr291Tyr  | < 1 | 4.8 |  |  |  |  |
|    | COX1    | 5985  | A | > | G | Ile28Val   | < 1 | 3.6 |  |  |  |  |
|    | COX1    | 5999  | C | > | T | Ala32Ala   | < 1 | 3.9 |  |  |  |  |
|    | COX1    | 6047  | G | > | A | Leu48Leu   | < 1 | 3.7 |  |  |  |  |
|    | COX1    | 6146  | G | > | A | Trp81Trp   | < 1 | 2.6 |  |  |  |  |
|    | COX1    | 7028  | T | > | C | Ala375Ala  | < 1 | 4.0 |  |  |  |  |
|    | ATP6    | 9070  | G | > | T | Ala128Ser  | < 1 | 2.9 |  |  |  |  |
|    | ND4     | 11467 | G | > | A | Leu236Leu  | < 1 | 4.0 |  |  |  |  |
|    | ND4     | 11719 | A | > | G | Gly320Gly  | < 1 | 3.3 |  |  |  |  |
|    | ND6     | 14620 | T | > | C | Gly18Gly   | < 1 | 2.0 |  |  |  |  |
|    | CYTB    | 14766 | T | > | C | Ile7Thr    | < 1 | 3.4 |  |  |  |  |
|    | CYTB    | 14866 | T | > | C | Cys40Cys   | < 1 | 4.6 |  |  |  |  |
|    | D-Loop  | 16126 | T | > | C | nc         | < 1 | 2.2 |  |  |  |  |
|    | D-Loop  | 16145 | G | > | A | nc         | < 1 | 2.2 |  |  |  |  |
|    | D-Loop  | 16172 | T | > | C | nc         | < 1 | 2.0 |  |  |  |  |
|    | D-Loop  | 16356 | C | > | T | nc         | < 1 | 7.8 |  |  |  |  |
|    | D-Loop  | 16519 | C | > | T | nc         | < 1 | 2.6 |  |  |  |  |
| 8  | D-Loop  | 340   | C | > | A | nc         | < 1 | 3.3 |  |  |  |  |
|    | tRNAHis | 12172 | A | > | G | nc         | < 1 | 2.9 |  |  |  |  |
|    | ND5     | 12937 | A | > | G | Met201Val  | < 1 | 2.1 |  |  |  |  |
|    | CYTB    | 15043 | G | > | A | Gly99Gly   | < 1 | 2.1 |  |  |  |  |
|    | CYTB    | 15693 | T | > | C | Met316Thr  | < 1 | 2.5 |  |  |  |  |
|    | D-Loop  | 16519 | T | > | C | nc         | < 1 | 2.7 |  |  |  |  |
| 9  | D-Loop  | 95    | A | > | C | nc         | < 1 | 3.4 |  |  |  |  |
|    | D-Loop  | 152   | T | > | C | nc         | 4.3 | 5.6 |  |  |  |  |
|    | D-Loop  | 499   | G | > | A | nc         | 5.1 | 3.0 |  |  |  |  |
|    | COX1    | 6047  | A | > | G | Leu48Leu   | < 1 | 2.5 |  |  |  |  |
|    | COX1    | 6182  | G | > | A | Ala93Ala   | 3.5 | 4.3 |  |  |  |  |
|    | COX2    | 7645  | T | > | C | Leu20Leu   | < 1 | 8.5 |  |  |  |  |
|    | COX3    | 9947  | A | > | G | Val247Val  | 9.2 | < 1 |  |  |  |  |
|    | ND5     | 12937 | A | > | G | Met201Val  | 2.1 | 2.2 |  |  |  |  |
|    | ND5     | 13404 | T | > | C | Ile356Ile  | 2.9 | 4.3 |  |  |  |  |
|    | ND6     | 14620 | C | > | T | Gly18Gly   | 3.0 | < 1 |  |  |  |  |
|    | CYTB    | 15544 | C | > | A | Pro266Pro  | < 1 | 3.8 |  |  |  |  |
|    | CYTB    | 15758 | A | > | G | Ile338Val  | 5.2 | < 1 |  |  |  |  |
|    | D-Loop  | 16134 | C | > | T | nc         | 3.1 | < 1 |  |  |  |  |
|    | D-Loop  | 16352 | T | > | C | nc         | < 1 | 3.6 |  |  |  |  |
| 11 | HV3     | 456   | T | > | C | nc         | < 1 | 3.0 |  |  |  |  |
|    | 16sRNA  | 709   | A | > | G | nc         | < 1 | 3.2 |  |  |  |  |
|    | 16sRNA  | 1811  | A | > | G | nc         | < 1 | 2.0 |  |  |  |  |
|    | 16sRNA  | 1880  | C | > | A | *nc        | < 1 | 2.2 |  |  |  |  |
|    | 16sRNA  | 2487  | A | > | C | *nc        | < 1 | 2.0 |  |  |  |  |
|    | 16sRNA  | 2570  | C | > | T | *nc        | 5.1 | < 1 |  |  |  |  |
|    | 16sRNA  | 3010  | G | > | A | nc         | < 1 | 3.3 |  |  |  |  |
|    | COX2    | 7028  | C | > | T | Ala375Ala  | < 1 | 2.2 |  |  |  |  |

|    |         |       |   |   |   |                       |      |      |      |     |      |      |
|----|---------|-------|---|---|---|-----------------------|------|------|------|-----|------|------|
|    | ATP6    | 8084  | G | > | A | Ala167Thr             | < 1  | 2.5  |      |     |      |      |
|    | ATP6    | 9053  | A | > | G | Arg176Ser             | < 1  | 4.6  |      |     |      |      |
|    | ND4     | 9070  | T | > | G | Ser128Ala             | < 1  | 2.5  |      |     |      |      |
|    | ND4     | 11009 | T | > | C | Leu84Leu              | < 1  | 2.3  |      |     |      |      |
|    | CYTB    | 11169 | G | > | A | *Gly137Asp            | 2.1  | < 1  |      |     |      |      |
|    | CYTB    | 14766 | C | > | T | nc                    | < 1  | 2.3  |      |     |      |      |
| 12 | 12sRNA  | 1338  | A | > | G | *nc                   | < 1  | < 1  | 21.8 | < 1 | 27.6 | 7.9  |
|    | ND2     | 5053  | C | > | A | *Pro195Glu            | < 1  | < 1  | < 1  | < 1 | 2.1  | < 1  |
|    | ATP6    | 8781  | C | > | G | *Leu85Leu             | 4.1  | < 1  | < 1  | < 1 | < 1  | < 1  |
|    | COX3    | 9840  | T | > | C | Ser212Pro             | < 1  | < 1  | < 1  | < 1 | 41.1 | 31.2 |
|    | ND3     | 10306 | A | > | G | *Arg83Ser             | < 1  | < 1  | 3.9  | < 1 | < 1  | < 1  |
|    | ND4L    | 10531 | T | > | C | *Val21Ala             | 3.5  | < 1  | < 1  | < 1 | < 1  | < 1  |
|    | ND4     | 11827 | T | > | C | Ala356Ala             | < 1  | < 1  | < 1  | < 1 | 2.0  | < 1  |
|    | ND4     | 12129 | T | > | C | Phe457Ser             | < 1  | < 1  | < 1  | < 1 | 8.2  | < 1  |
|    | ND5     | 12367 | A | > | G | Thr11Ala              | < 1  | < 1  | < 1  | 7.0 | < 1  | < 1  |
| 13 | D-Loop  | 73    | A | > | G | nc                    | 4.9  | 2.7  |      |     |      |      |
|    | D-Loop  | 152   | T | > | C | nc                    | 4.9  | 3.1  |      |     |      |      |
|    | 12sRNA  | 1360  | G | > | A | *nc                   | 2.0  | < 1  |      |     |      |      |
|    | 16sRNA  | 3010  | A | > | G | nc                    | 2.6  | 5.0  |      |     |      |      |
|    | COX1    | 5999  | T | > | C | Ala32Ala              | 2.5  | < 1  |      |     |      |      |
|    | COX1    | 6047  | A | > | G | Leu48Leu              | 2.0  | < 1  |      |     |      |      |
|    | COX1    | 6385  | C | > | A | *Ala161Asp            | 2.0  | < 1  |      |     |      |      |
|    | ATP6/8  | 8572  | A | > | G | Gly16Ser/ Stop-69Stop | 3.8  | < 1  |      |     |      |      |
|    | ND4     | 11332 | C | > | T | Ala191Ala             | 2.1  | < 1  |      |     |      |      |
|    | tRNAHis | 12172 | G | > | A | nc                    | 3.4  | 5.0  |      |     |      |      |
|    | ND5     | 12501 | G | > | A | Met55Met              | 3.8  | < 1  |      |     |      |      |
|    | ND5     | 12705 | C | > | T | Ile123Ile             | 5.4  | < 1  |      |     |      |      |
|    | ND5     | 12937 | A | > | G | Met201Val             | 2.3  | < 1  |      |     |      |      |
|    | ND5     | 13404 | T | > | C | Ile356Ile             | 3.7  | < 1  |      |     |      |      |
|    | ND5     | 13416 | A | > | G | Gly360Gly             | 2.1  | 2.1  |      |     |      |      |
|    | ND6     | 14438 | G | > | A | *Pro79Leu             | < 1  | 2.0  |      |     |      |      |
|    | ND6     | 14620 | C | > | T | Gly18Gly              | 2.7  | < 1  |      |     |      |      |
|    | CYTB    | 15043 | G | > | A | Gly99Gly              | < 1  | 3.2  |      |     |      |      |
|    | CYTB    | 15693 | T | > | C | Met316Thr             | < 1  | 2.1  |      |     |      |      |
|    | CYTB    | 15758 | A | > | G | Ile338Val             | 5.6  | < 1  |      |     |      |      |
|    | D-Loop  | 16337 | C | > | A | nc                    | 2.1  | < 1  |      |     |      |      |
|    | D-Loop  | 16356 | T | > | C | nc                    | < 1  | 2.1  |      |     |      |      |
|    | D-Loop  | 16051 | A | > | G | nc                    | < 1  | 4.7  |      |     |      |      |
|    | D-Loop  | 16362 | T | > | C | nc                    | < 1  | 4.1  |      |     |      |      |
|    | D-Loop  | 16390 | G | > | A | nc                    | < 1  | 2.1  |      |     |      |      |
| 14 | ND5     | 13153 | A | > | G | Ile273Val             | < 1  | 12.9 |      |     |      |      |
| 15 | 16sRNA  | 3010  | G | > | A | nc                    | < 1  | 2.2  |      |     |      |      |
|    | COX1    | 6272  | A | > | G | Gly123Gly             | 3.6  | < 1  |      |     |      |      |
|    | ND4L    | 10695 | G | > | A | Ala76Thr              | 15.6 | < 1  |      |     |      |      |
|    | ND5     | 13131 | C | > | A | *Pro265Pro            | < 1  | 2.0  |      |     |      |      |
|    | CYTB    | 14869 | G | > | A | Leu41Leu              | 3.9  | 2.2  |      |     |      |      |

|    |         |       |   |   |   |            |     |     |  |  |  |  |
|----|---------|-------|---|---|---|------------|-----|-----|--|--|--|--|
|    | tRNAThr | 15904 | T | > | C | nc         | < 1 | 5.3 |  |  |  |  |
| 16 | ND1     | 3492  | A | > | C | Lys62Asn   | 3.5 | < 1 |  |  |  |  |
|    | COX1    | 6419  | A | > | C | Lys172Asn  | 5.2 | 5.1 |  |  |  |  |
|    | COX1    | 6968  | C | > | A | *Gly355Gly | 2.3 | < 1 |  |  |  |  |
|    | ND5     | 13368 | G | > | A | Gly344Gly  | < 1 | 2.9 |  |  |  |  |
|    | CYTB    | 15607 | A | > | G | Lys287Lys  | < 1 | 2.5 |  |  |  |  |
|    | D-Loop  | 16163 | A | > | G | nc         | < 1 | 5.0 |  |  |  |  |
|    | D-Loop  | 16294 | C | > | T | nc         | < 1 | 3.3 |  |  |  |  |

<sup>a</sup>Variant position and substitution: Gene or region in the mitochondrial genome, variant position in the mitochondrial genome, base and amino acid substitution. Previously unpublished variants according to MITOMAP are marked with an asterisk (\*). ATP6/8, ATP synthase subunit 6 and 8; COX1, COX2 and COX3 cytochrome c oxidase subunit 1, 2 and 3; CYTB, cytochrome b; D-Loop, displacement loop; HV3, hypervariable region 3; nc, non coding; ND1-6, mt encoded NADH dehydrogenase 1-6; tRNAGlu, tRNAHis, tRNALeu2 and tRNAThr, tRNA Glutamin, Histidine, Leucine 2 and Threonine; 12sRNA and 16sRNA, 12s and 16s ribosomal RNA.

<sup>b</sup>Percentage of mitochondrial allele frequency. P, primary tumor; R1–R5: first to fifth relapse; < 1, allele frequency below the threshold set at 1%.

### Supplementary Table S3: Recurrent tumor-specific mt variants

| Variant position and substitution <sup>a</sup> |       |   |   |   |           | Tumors with variants<br>(n) |   | Mean variant allele<br>frequency <sup>b</sup> (%) |     |
|------------------------------------------------|-------|---|---|---|-----------|-----------------------------|---|---------------------------------------------------|-----|
|                                                |       |   |   |   |           | P                           | R | P                                                 | R   |
| D-Loop                                         | 73    | A | > | G | nc        | 1                           | 3 | 4.9                                               | 3.9 |
| D-Loop                                         | 152   | C | > | T | nc        | 2                           | 4 | 4.3                                               | 5.2 |
| D-Loop                                         | 499   | A | > | G | nc        | 1                           | 2 | 5.1                                               | 3.8 |
| 16sRNA                                         | 1811  | A | > | G | nc        | 0                           | 2 | < 1                                               | 2.9 |
| 16sRNA                                         | 2706  | A | > | G | nc        | 0                           | 2 | < 1                                               | 2.7 |
| 16sRNA                                         | 3010  | G | > | A | nc        | 1                           | 5 | 2.3                                               | 3.0 |
| COX1                                           | 5999  | C | > | T | Ala32Ala  | 1                           | 1 | 2.5                                               | 3.9 |
| COX1                                           | 6047  | A | > | G | Leu48Leu  | 1                           | 2 | 2.0                                               | 3.1 |
| COX1                                           | 6146  | A | > | G | Trp81Trp  | 0                           | 2 | < 1                                               | 2.5 |
| COX1                                           | 7028  | C | > | T | Ala375Ala | 0                           | 4 | < 1                                               | 3.1 |
| COX1                                           | 7645  | T | > | C | Leu20Leu  | 0                           | 2 | < 1                                               | 6.1 |
| ATP6                                           | 9070  | G | > | T | Ala128Ser | 0                           | 2 | < 1                                               | 2.7 |
| ND4                                            | 11009 | T | > | C | Leu84Leu  | 0                           | 2 | < 1                                               | 2.6 |
| ND4                                            | 11467 | A | > | G | Leu236Leu | 0                           | 2 | < 1                                               | 3.4 |
| ND4                                            | 11719 | A | > | G | Gly320Gly | 1                           | 4 | 2.1                                               | 4.5 |
| tRNAHis                                        | 12172 | A | > | G | nc        | 1                           | 3 | 3.4                                               | 4.0 |
| ND5                                            | 12705 | C | > | T | Ile123Ile | 1                           | 1 | 5.4                                               | 2.4 |
| ND5                                            | 12937 | A | > | G | Met201Val | 2                           | 2 | 2.2                                               | 2.2 |
| ND5                                            | 13404 | T | > | C | Ile356Ile | 2                           | 1 | 3.3                                               | 4.3 |
| ND6                                            | 14620 | T | > | C | Gly18Gly  | 2                           | 2 | 2.9                                               | 5.0 |
| CYTB                                           | 14766 | C | > | T | Ile7Thr   | 1                           | 5 | 6.1                                               | 3.9 |
| CYTB                                           | 15043 | G | > | A | Gly99Gly  | 0                           | 2 | < 1                                               | 2.7 |
| CYTB                                           | 15544 | A | > | C | Pro266Pro | 0                           | 2 | < 1                                               | 4.3 |
| CYTB                                           | 15693 | C | > | T | Met316Thr | 0                           | 4 | < 1                                               | 4.3 |
| CYTB                                           | 15758 | A | > | G | Ile338Val | 2                           | 0 | 5.4                                               | < 1 |

|        |       |   |   |   |    |   |   |     |     |
|--------|-------|---|---|---|----|---|---|-----|-----|
| D-Loop | 16311 | T | > | C | nc | 1 | 1 | 5.7 | 2.1 |
| D-Loop | 16356 | C | > | T | nc | 0 | 3 | < 1 | 7.9 |
| D-Loop | 16519 | C | > | T | nc | 0 | 4 | < 1 | 3.5 |

<sup>a</sup>Variant position and substitution: Gene or region in the mitochondrial genome, variant position in the mitochondrial genome, base and amino acid substitution. COX1, cytochrome c oxidase subunit 1; CYTB, cytochrome b; D-Loop, displacement loop; nc, non coding; ND4-6, mt encoded NADH dehydrogenase 4–6; tRNAHis, tRNA Histidine; 16sRNA, 16s ribosomal RNA.

<sup>b</sup>Percentage of mitochondrial allele frequency. P, primary tumor; R, relapse tumor; < 1, allele frequency below the threshold set at 1%.
